# Supplementary material
Source: PubMed Central journal article supplement (PMC4987212)
Supplement: NIHMS776302-supplement-1.pdf [file NIHMS776302-supplement-1.pdf]

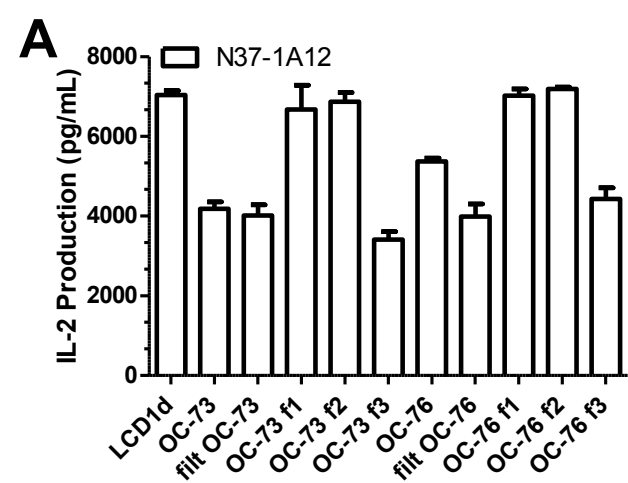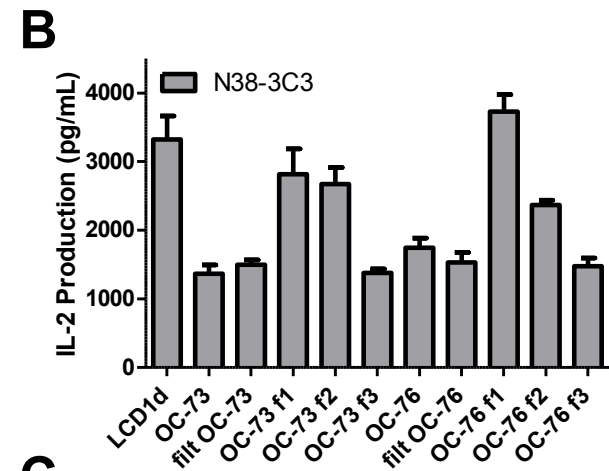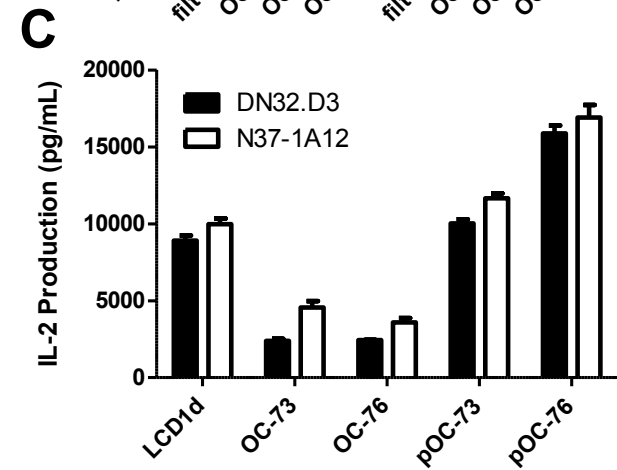

**Supplemental Figure 1. Ovarian cancer associated ascites contains soluble inhibitory factors.** The ascites was cleared of cellular debris by centrifugation as previously described (18). (A, B) The ascites was filtered 0.2 micron filter and fractionated-f1: <5KDa; f2: 5-50KDa; f3: >50. (C) The ascites was treated with 50 µg/ml proteinase K at 37°C for 1 hour and then incubated at 95°C for 10min to heat inactivate the enzyme. The antigen presenting cells were treated with the clarified supernatants for 4 h at 37°C, then washed extensively with PBS, and cocultured with NKT hybridomas for 20-24 h at 37°C. Cytokine released (IL-2) was measured as an indication of NKT cell activation and was measured by standard sandwich ELISA.
