# Supplementary material
Source: PubMed Central journal article supplement (PMC4987212)
Supplement: NIHMS776302-supplement-2.pdf [file NIHMS776302-supplement-2.pdf]

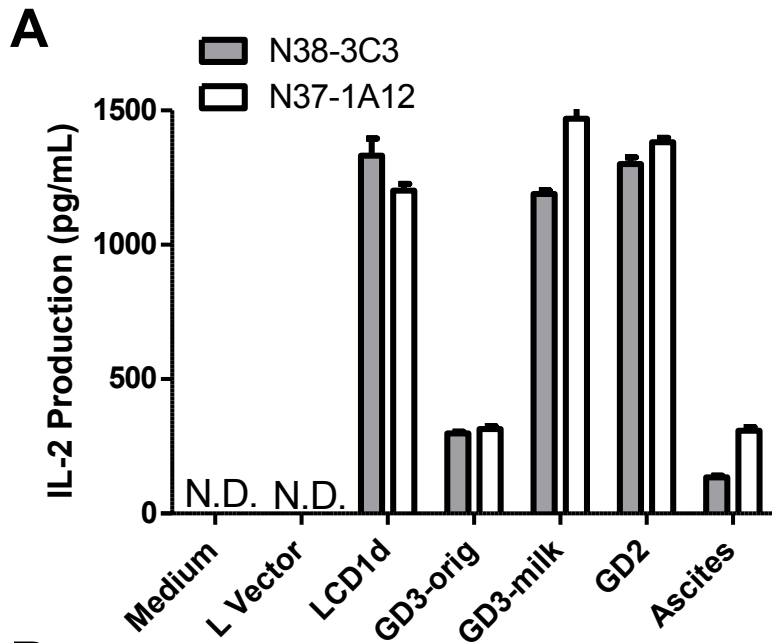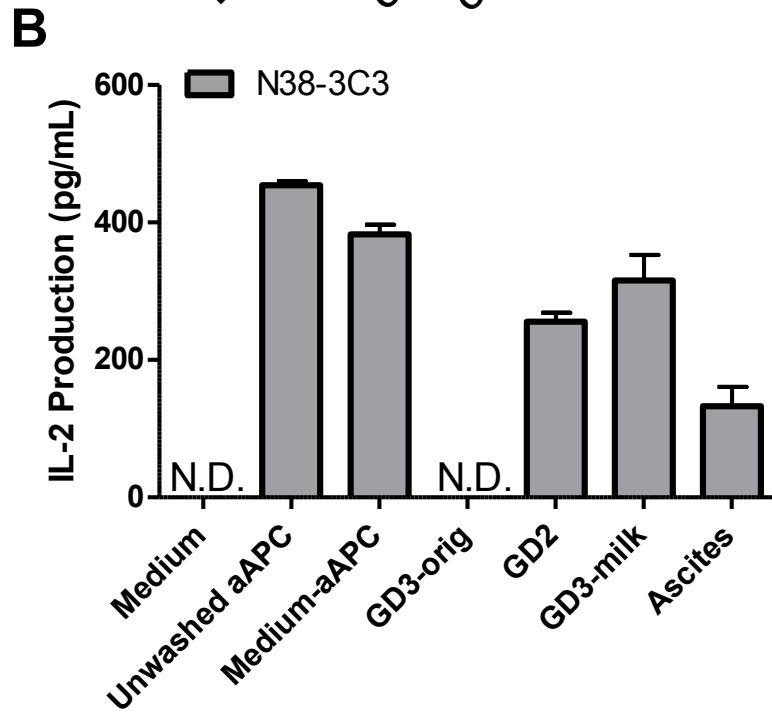

**Supplemental Figure 2. The source of GD3 impacts CD1d-mediated antigen presentation.** (A) LCD1d cells were treated with GD3 from different sources for 4 hours, then washed extensively and cocultured with NKT cell hybridomas. IL-2 was measured, as an indication of NKT cell activation, by standard cytokine ELISA. (B) Pretreatment of  $\alpha$ -GalCer loaded aAPC with GD3.  $\alpha$ -GalCer loaded aAPC were incubated for 4hr with either medium, GD3, GD2, or ovarian cancer-associated ascites. The aAPC were washed extensively and then cocultured with a  $V\alpha 14+$  NKT cell hybridoma, N38-3C3. NKT cell recognition of CD1d was assessed by measuring IL-2 production in the supernatants by ELISA.
